# Supplementary material
Source: HighWire-hosted journal article supplement (https://www.eneuro.org/content/8/5/ENEURO.0306-21.2021)
Supplement: inline-supplementary-material-1 [file inline-supplementary-material-1.zip]

# Burst Analysis Flow Chart

Saturday, February 6, 2021 7:49 PM

From Smart Cone

→ Get a wave for the recording  
Notes include gap info

○ Whole recording

○ Region Table

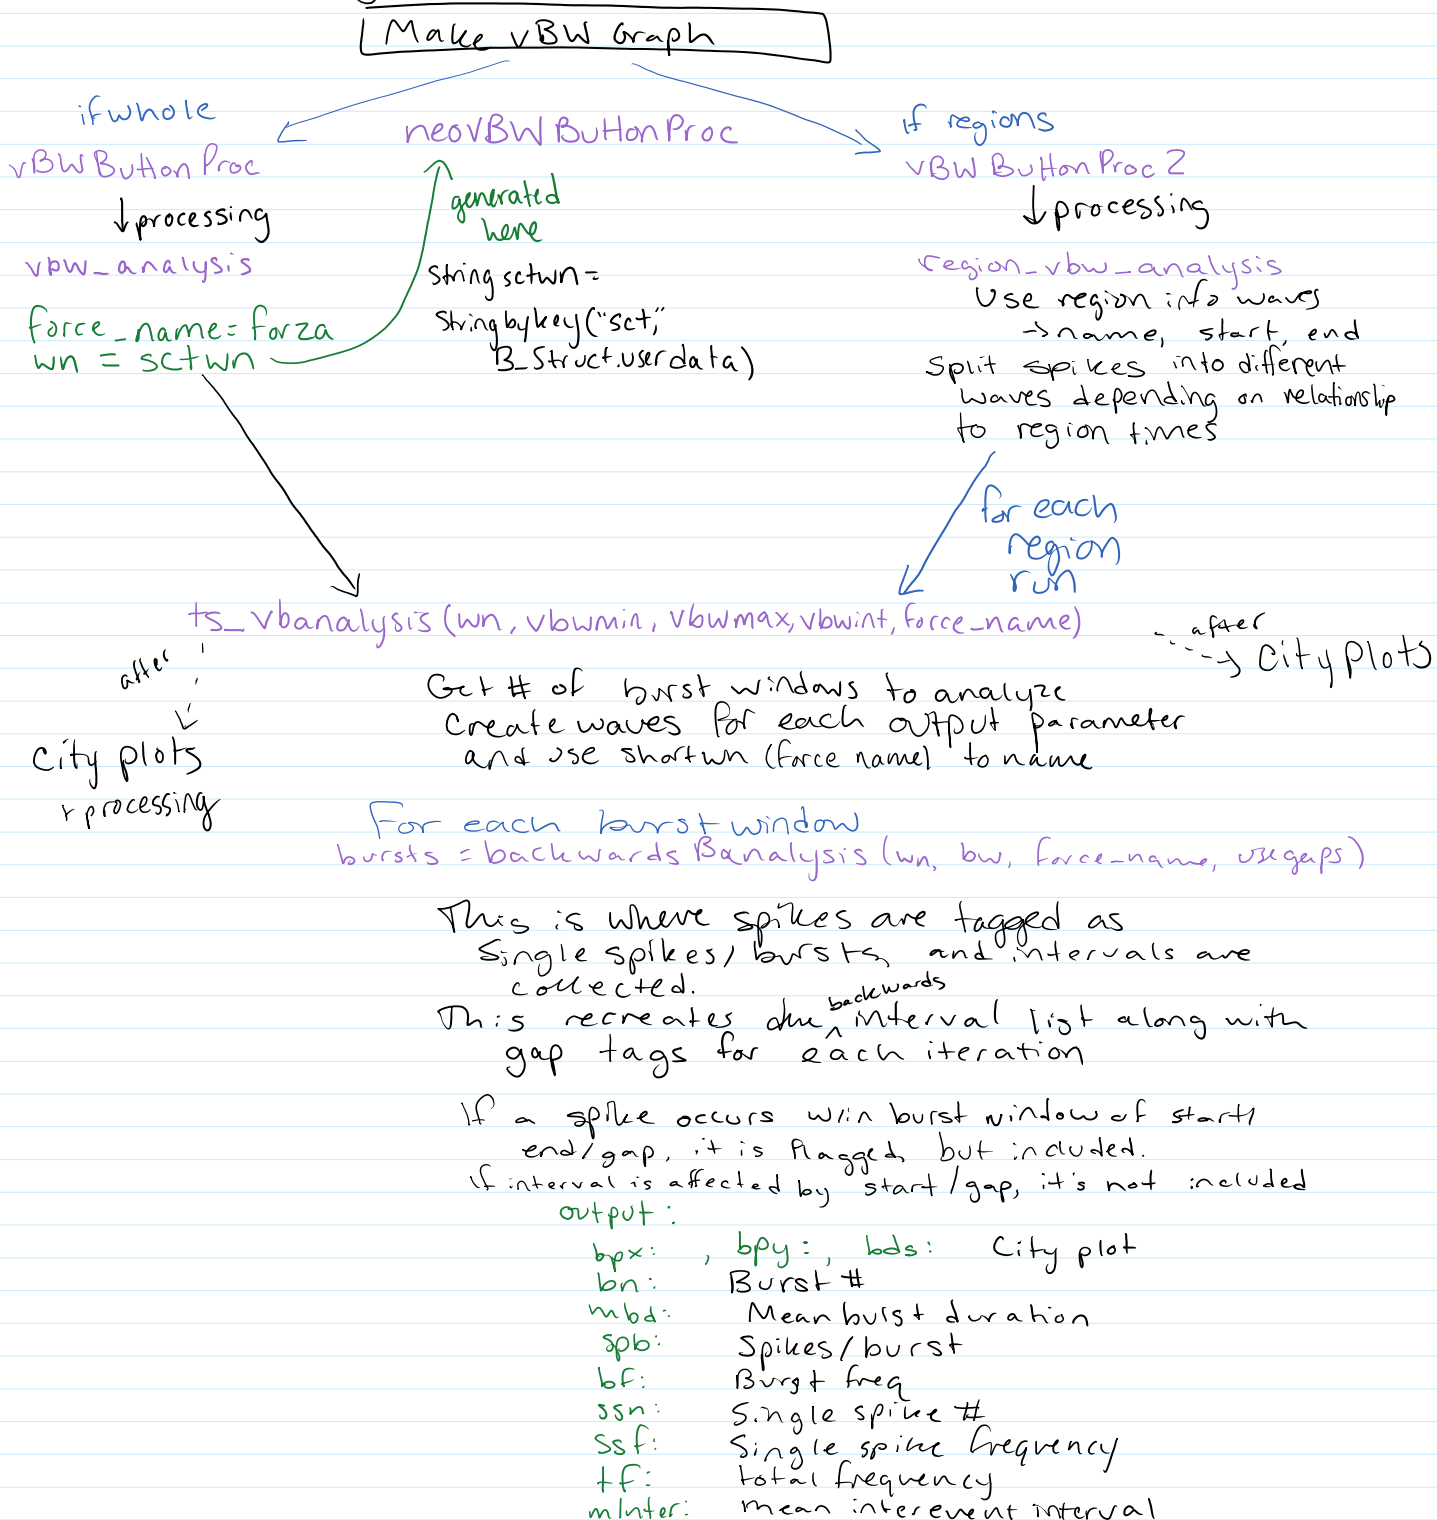

mlntra: mean intraburst interval  
bdoubts: # of bursts flagged w/ doubts  
ssboubts: # single spikes flagged w/ doubts

VBW\_OP (wn, bursts) - uncertain if necessary w/  
current iteration)

Add this burst info to output waves for this  
burst window

## Make VBW Tables

makeVBWTables Proc

If VBW-enabled  
The waves already exist, need to show them  
in a table

↳ makeVBWTables

analysis\_types

bn; mbd; spb; bf; ssb; ssf; tf; inter; intra;  
bdoubts; ssdoubts

Will look for these waves belonging  
in data folder

if Region VBW Enabled

# of regions = # of names counted

else

# of regions = 1

output to VBW table

for each region

For first iteration, add burst window wave

Append each parameter wave  
to the table
